# Supplementary material
Source: PubMed Central journal article supplement (PMC5462037)
Supplement: supp_pp.17.00156_PP2017-RA-00156R2_Supp_Fig_2.pdf [file supp_pp.17.00156_PP2017-RA-00156R2_Supp_Fig_2.pdf]

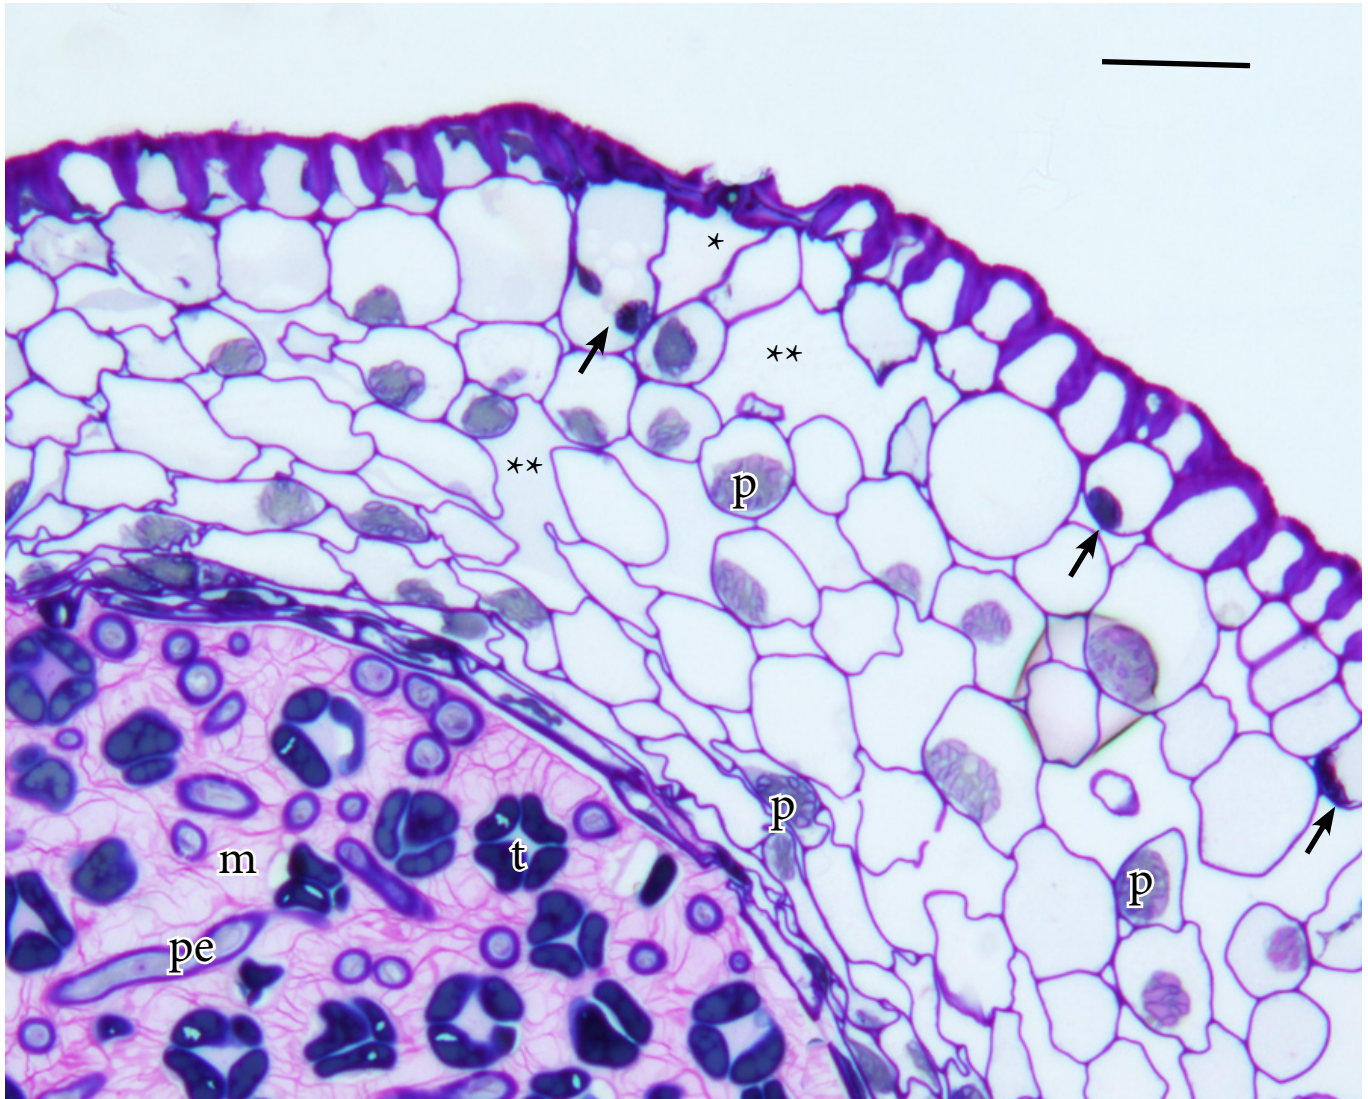

Supplemental Figure 2. *Leiosporoceros dusii*. Cross section light micrograph of a sporophyte with a large collapse stoma over a substomatal cavity (\*) that connects to a system of intercellular air-filled spaces (\*\*). Other than those near substomatal cavities that are dying (arrows), assimilative cells are photosynthetic as evidenced by large chloroplasts (p). The spore tetrads (t) and pseudoe-laters (pe) are developed and are bathed in mucilage (m). Bar=50 $\mu$ m.
