# Supplementary material
Source: PubMed Central journal article supplement (PMC5462037)
Supplement: supp_pp.17.00156_PP2017-RA-00156R2_Supplemental_Material.pdf [file supp_pp.17.00156_PP2017-RA-00156R2_Supplemental_Material.pdf]

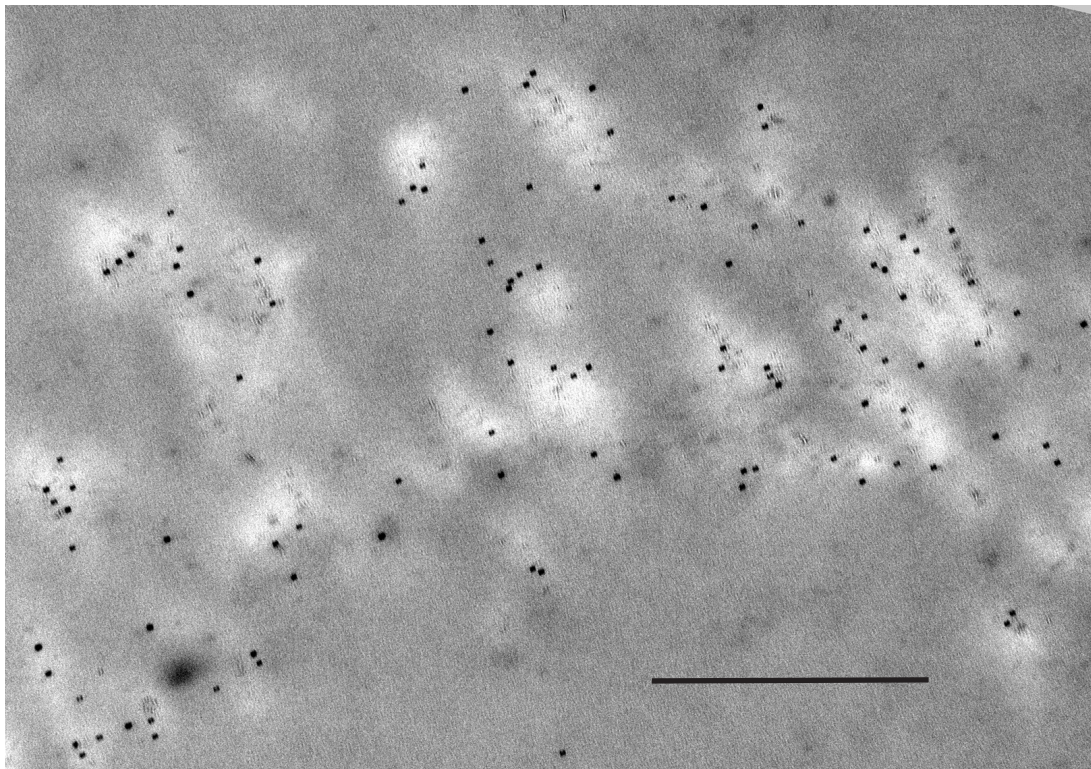

Supplemental Figure 1: TEM immuno-gold localization of LM19 pectin epitopes in mucilage in spore sac of *Leiosporoceros* sporophyte, black dots in images are secondary gold labels attached to specific antibodies. Bar=0.5  $\mu\text{m}$ .
